# Supplementary material
Source: PubMed Central journal article supplement (PMC8733438)
Supplement: iyab166_supplementary_data.pdf [file iyab166_supplementary_data.pdf]

1 **SUPPLEMENTARY FIGURES**

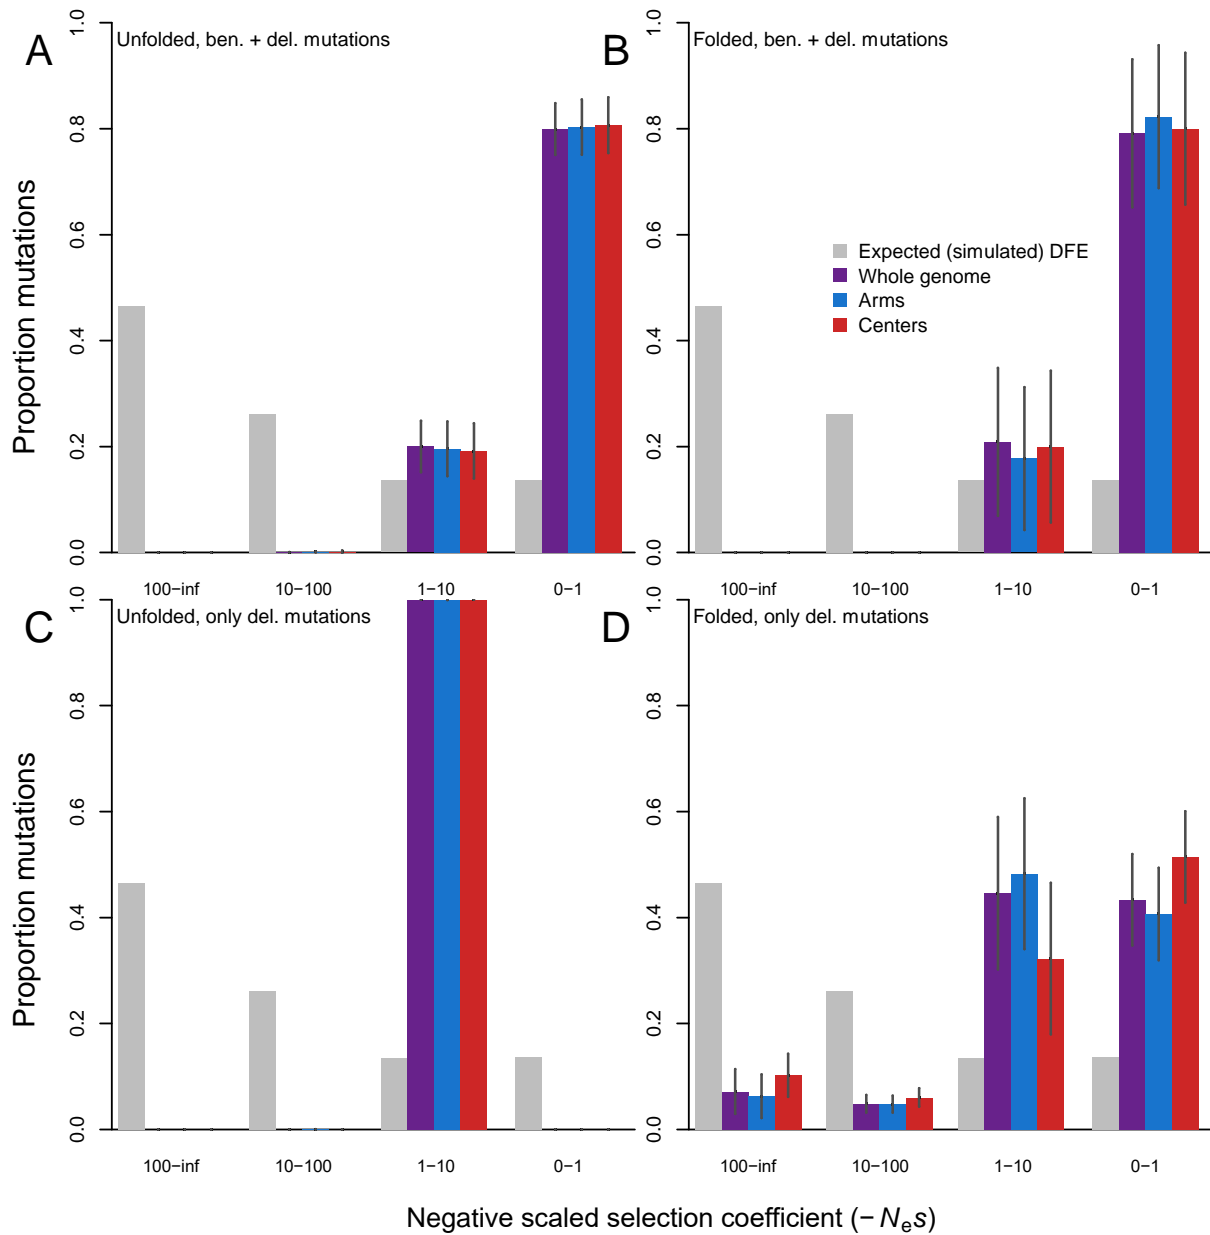

2

3 Figure S1. DFE-alpha analysis of simulated datasets using unfolded SFS as input (A, C) versus  
 4 the folded SFS as input (B,D, as in Figure 6). These analyses performed more poorly than folded  
 5 analyses at matching the input DFE (gray bars), particularly when simulations only included  
 6 deleterious mutations (C,D), so therefore were not used in further analyses. All estimated  
 7 parameters of the inferred DFE are listed in Table S2.

8

9

10 Table S1. The set of 326 *C. elegans* strains used in this study, and their classification as “swept”  
 11 or “divergent” (see main text Methods for details).

| strain   | strain_set | strain  | strain_set | strain | strain_set | strain | strain_set |
|----------|------------|---------|------------|--------|------------|--------|------------|
| AB1      | swept      | EG4946  | swept      | JU3134 | swept      | NIC268 | divergent  |
| BRC20067 | swept      | GXW1    | swept      | JU3135 | swept      | NIC269 | swept      |
| BRC20263 | swept      | JT11398 | swept      | JU3137 | swept      | NIC271 | swept      |
| CB4851   | swept      | JU1088  | swept      | JU3140 | swept      | NIC272 | swept      |
| CB4852   | swept      | JU1172  | swept      | JU3141 | swept      | NIC274 | swept      |
| CB4853   | swept      | JU1200  | swept      | JU3144 | swept      | NIC275 | swept      |
| CB4854   | swept      | JU1212  | swept      | JU3166 | swept      | NIC276 | swept      |
| CB4855   | swept      | JU1213  | swept      | JU3167 | divergent  | NIC277 | swept      |
| CB4856   | divergent  | JU1242  | swept      | JU3169 | swept      | NIC3   | swept      |
| CB4857   | swept      | JU1246  | swept      | JU3224 | swept      | NIC501 | swept      |
| CB4858   | swept      | JU1249  | swept      | JU3225 | swept      | NIC511 | swept      |
| CB4932   | swept      | JU1395  | swept      | JU3226 | divergent  | NIC513 | swept      |
| CX11254  | swept      | JU1400  | swept      | JU3228 | swept      | NIC514 | swept      |
| CX11262  | swept      | JU1409  | swept      | JU323  | swept      | NIC515 | swept      |
| CX11264  | swept      | JU1440  | swept      | JU3280 | swept      | NIC522 | swept      |
| CX11271  | swept      | JU1491  | swept      | JU3282 | swept      | NIC523 | swept      |
| CX11276  | swept      | JU1530  | swept      | JU3291 | swept      | NIC526 | swept      |
| CX11285  | swept      | JU1543  | swept      | JU346  | swept      | NIC527 | swept      |
| CX11292  | swept      | JU1568  | swept      | JU360  | swept      | NIC528 | swept      |
| CX11307  | swept      | JU1581  | swept      | JU367  | swept      | NIC529 | swept      |
| CX11314  | swept      | JU1586  | swept      | JU393  | swept      | PB303  | swept      |
| CX11315  | swept      | JU1652  | swept      | JU394  | swept      | PB306  | swept      |
| DL200    | swept      | JU1666  | swept      | JU397  | swept      | PS2025 | swept      |
| DL226    | swept      | JU1792  | swept      | JU406  | swept      | PX179  | swept      |
| DL238    | divergent  | JU1793  | swept      | JU440  | swept      | QG2075 | swept      |
| ECA189   | divergent  | JU1808  | swept      | JU561  | swept      | QG2811 | swept      |
| ECA191   | divergent  | JU1896  | swept      | JU642  | swept      | QG2813 | swept      |
| ECA347   | divergent  | JU1934  | swept      | JU751  | swept      | QG2818 | swept      |
| ECA348   | swept      | JU2001  | swept      | JU774  | swept      | QG2823 | swept      |
| ECA349   | swept      | JU2007  | swept      | JU775  | swept      | QG2824 | swept      |
| ECA36    | divergent  | JU2016  | swept      | JU778  | swept      | QG2825 | swept      |
| ECA363   | divergent  | JU2017  | swept      | JU782  | swept      | QG2827 | swept      |
| ECA369   | divergent  | JU2106  | swept      | JU792  | swept      | QG2828 | swept      |
| ECA372   | divergent  | JU2131  | swept      | JU830  | swept      | QG2832 | swept      |
| ECA396   | divergent  | JU2141  | swept      | JU847  | swept      | QG2835 | swept      |
| ECA592   | swept      | JU2234  | swept      | KR314  | swept      | QG2836 | swept      |
| ECA593   | divergent  | JU2250  | swept      | LKC34  | swept      | QG2837 | swept      |
| ECA594   | swept      | JU2257  | swept      | MY1    | swept      | QG2838 | swept      |
| ECA640   | swept      | JU2316  | divergent  | MY10   | swept      | QG2841 | swept      |
| ECA703   | divergent  | JU2464  | swept      | MY16   | divergent  | QG2843 | swept      |
| ECA705   | divergent  | JU2466  | swept      | MY18   | swept      | QG2846 | swept      |
| ECA706   | divergent  | JU2478  | swept      | MY2147 | swept      | QG2850 | swept      |

|        |           |        |           |         |           |        |           |
|--------|-----------|--------|-----------|---------|-----------|--------|-----------|
| ECA710 | divergent | JU2513 | swept     | MY2212  | swept     | QG2854 | swept     |
| ECA712 | divergent | JU2519 | swept     | MY23    | divergent | QG2855 | swept     |
| ECA722 | divergent | JU2522 | swept     | MY2453  | swept     | QG2857 | swept     |
| ECA723 | divergent | JU2526 | divergent | MY2530  | swept     | QG2873 | swept     |
| ECA724 | divergent | JU2534 | swept     | MY2535  | swept     | QG2874 | swept     |
| ECA730 | divergent | JU2565 | swept     | MY2573  | swept     | QG2875 | swept     |
| ECA732 | divergent | JU2566 | swept     | MY2585  | swept     | QG2877 | swept     |
| ECA733 | divergent | JU2570 | swept     | MY2693  | swept     | QG2932 | swept     |
| ECA738 | divergent | JU2572 | swept     | MY2713  | swept     | QG536  | swept     |
| ECA740 | divergent | JU2575 | swept     | MY2741  | swept     | QG556  | swept     |
| ECA741 | divergent | JU2576 | swept     | MY518   | swept     | QG557  | swept     |
| ECA742 | divergent | JU2578 | swept     | MY679   | swept     | QW947  | swept     |
| ECA743 | divergent | JU258  | swept     | MY772   | swept     | QX1211 | divergent |
| ECA744 | divergent | JU2581 | swept     | MY795   | swept     | QX1212 | swept     |
| ECA745 | divergent | JU2586 | swept     | MY920   | swept     | QX1233 | swept     |
| ECA746 | divergent | JU2587 | swept     | N2      | swept     | QX1791 | divergent |
| ECA760 | divergent | JU2592 | swept     | NIC1    | swept     | QX1792 | swept     |
| ECA768 | divergent | JU2593 | swept     | NIC1049 | swept     | QX1793 | divergent |
| ECA777 | divergent | JU2600 | swept     | NIC1107 | swept     | QX1794 | divergent |
| ECA778 | divergent | JU2610 | swept     | NIC1119 | swept     | RC301  | swept     |
| ECA807 | divergent | JU2619 | swept     | NIC166  | swept     | WN2001 | swept     |
| ECA812 | divergent | JU2800 | swept     | NIC195  | swept     | WN2002 | swept     |
| ECA923 | swept     | JU2811 | swept     | NIC199  | swept     | WN2033 | swept     |
| ECA928 | swept     | JU2825 | swept     | NIC2    | swept     | WN2050 | swept     |
| ECA930 | swept     | JU2829 | swept     | NIC207  | swept     | WN2063 | swept     |
| ED3005 | swept     | JU2838 | swept     | NIC231  | swept     | WN2064 | swept     |
| ED3011 | swept     | JU2841 | swept     | NIC236  | swept     | WN2066 | swept     |
| ED3012 | swept     | JU2853 | swept     | NIC242  | swept     | XZ1513 | divergent |
| ED3017 | swept     | JU2862 | swept     | NIC251  | divergent | XZ1514 | divergent |
| ED3040 | swept     | JU2866 | swept     | NIC252  | swept     | XZ1515 | swept     |
| ED3046 | swept     | JU2878 | swept     | NIC255  | swept     | XZ1516 | ancestor  |
| ED3048 | swept     | JU2879 | swept     | NIC256  | swept     | XZ1672 | swept     |
| ED3049 | swept     | JU2906 | swept     | NIC258  | swept     | XZ1734 | swept     |
| ED3052 | swept     | JU2907 | swept     | NIC259  | swept     | XZ1735 | swept     |
| ED3073 | swept     | JU310  | swept     | NIC260  | swept     | XZ1756 | swept     |
| ED3077 | swept     | JU311  | swept     | NIC261  | swept     | XZ2018 | swept     |
| EG4347 | swept     | JU3125 | swept     | NIC262  | swept     | XZ2019 | divergent |
| EG4349 | swept     | JU3127 | swept     | NIC265  | divergent | XZ2020 | swept     |
| EG4724 | swept     | JU3128 | swept     | NIC266  | swept     |        |           |
| EG4725 | swept     | JU3132 | swept     | NIC267  | swept     |        |           |

12

13

14 Table S2. Inferred parameters of the DFE for the simulated datasets using DFE-alpha, averaged  
 15 over 20 replicate simulations in each row.

| Dataset                                      | Genome portion | Mutation set             | Simulated census size | Simulated mean selection coefficient for deleterious mutation distribution | Simulated shape parameter for deleterious mutation distribution | Simulated dominance parameter ( $h$ ) | Population size after first epoch, in 2-epoch mode ( $N_2$ , relative to $N_1 = 100$ ) | Duration of epoch after first population size change ( $t_2$ ) | Weighted recent effective population size (Nw, Keightley & Eyre-Walker 2009) | Mean selection coefficient ( $E_s$ ) | Shape parameter ( $b$ ) |
|----------------------------------------------|----------------|--------------------------|-----------------------|----------------------------------------------------------------------------|-----------------------------------------------------------------|---------------------------------------|----------------------------------------------------------------------------------------|----------------------------------------------------------------|------------------------------------------------------------------------------|--------------------------------------|-------------------------|
| Simulated mixture distribution, folded SFS   | Whole          | Beneficial + deleterious | 500,000               | 95%                                                                        | 95%                                                             | 95%                                   | 1000                                                                                   | 101.00                                                         | 144.32                                                                       | -0.01                                | 100.00                  |
|                                              | Arms           |                          |                       | $s = -0.001$                                                               | shape = 0.3                                                     | $h = 0.3$                             | 1000                                                                                   | 101.00                                                         | 144.32                                                                       | -0.01                                | 100.00                  |
|                                              | Centers        |                          |                       | 5%                                                                         | 5%                                                              | 5%                                    | 1000                                                                                   | 101.00                                                         | 144.32                                                                       | -0.01                                | 100.00                  |
|                                              | Whole          | Only deleterious         |                       | $s = -0.01$                                                                | shape = 0.3                                                     | $h = 0.2$                             | 660                                                                                    | 111.00                                                         | 145.17                                                                       | -0.02                                | 1.14                    |
|                                              | Arms           |                          |                       | 600                                                                        | 101.00                                                          | 140.36                                | -0.02                                                                                  | 1.15                                                           |                                                                              |                                      |                         |
|                                              | Centers        |                          |                       | 799                                                                        | 135.71                                                          | 156.91                                | -2.52                                                                                  | 0.05                                                           |                                                                              |                                      |                         |
| Simulated mixture distribution, unfolded SFS | Whole          | Beneficial + deleterious | 500,000               | 95%                                                                        | 95%                                                             | 95%                                   | 1000                                                                                   | 96.00                                                          | 142.18                                                                       | 0.00                                 | 0.62                    |
|                                              | Arms           |                          |                       | $s = -0.001$                                                               | shape = 0.3                                                     | $h = 0.3$                             | 1000                                                                                   | 96.00                                                          | 142.18                                                                       | -0.01                                | 0.56                    |
|                                              | Centers        |                          |                       | 5%                                                                         | 5%                                                              | 5%                                    | 1000                                                                                   | 96.70                                                          | 142.48                                                                       | 0.00                                 | 0.85                    |
|                                              | Whole          | Only deleterious         |                       | $s = -0.01$                                                                | shape = 0.3                                                     | $h = 0.2$                             | 545                                                                                    | 86.07                                                          | 133.79                                                                       | -0.03                                | 100.00                  |
|                                              | Arms           |                          |                       | 495                                                                        | 78.13                                                           | 129.97                                | -0.03                                                                                  | 100.00                                                         |                                                                              |                                      |                         |
|                                              | Centers        |                          |                       | 660                                                                        | 104.91                                                          | 142.78                                | -0.03                                                                                  | 100.00                                                         |                                                                              |                                      |                         |
| Simulated extreme gamma                      | Whole          | Beneficial + deleterious | 500,000               | $s = -0.1606135$                                                           | shape = 2.1304                                                  | $h = 0.3$                             | 1000                                                                                   | 102.29                                                         | 144.87                                                                       | -5.17E+10                            | 0.10                    |
|                                              | Arms           |                          |                       | 1000                                                                       | 101.93                                                          | 144.72                                | -3.42E+13                                                                              | 0.10                                                           |                                                                              |                                      |                         |
|                                              | Centers        |                          |                       | 1000                                                                       | 104.42                                                          | 145.78                                | -3.12E+13                                                                              | 0.10                                                           |                                                                              |                                      |                         |
| Outcrossing, simulated mixture distribution  | Whole          | Beneficial + deleterious | 50,000                | 95%                                                                        | 95%                                                             | 95%                                   | 483.75                                                                                 | 135.37                                                         | 150.11                                                                       | -0.06                                | 0.32                    |
|                                              | Arms           |                          |                       | $s = -0.001$                                                               | shape = 0.3                                                     | $h = 0.3$                             | 425.4                                                                                  | 141.22                                                         | 149.77                                                                       | -0.07                                | 0.32                    |
|                                              | Centers        |                          |                       | 5%                                                                         | 5%                                                              | 5%                                    | 1000                                                                                   | 125.94                                                         | 154.92                                                                       | -0.03                                | 0.36                    |
| Outcrossing, simulated extreme distribution  | Whole          | Beneficial + deleterious | 50,000                | $s = -0.1606135$                                                           | shape = 2.1304                                                  | $h = 0.3$                             | 459                                                                                    | 131.62                                                         | 147.96                                                                       | -67.73                               | 0.71                    |
|                                              | Arms           |                          |                       | 411.05                                                                     | 141.84                                                          | 149.29                                | -91.74                                                                                 | 0.70                                                           |                                                                              |                                      |                         |
|                                              | Centers        |                          |                       | 1000                                                                       | 131.69                                                          | 157.35                                | -18.46                                                                                 | 0.74                                                           |                                                                              |                                      |                         |

16

17
